# Supplementary material for: Hexameric polyoxotantalate with proton conduction properties
Source: Royal Society of Chemistry journal article supplement (doi:10.1039/d3cc03645f), 2023-01-01
Supplement: d3cc03645f1.pdf [file d3cc03645f1.pdf]

# Hexameric Polyoxotantalate with Proton Conduction

## Property

Hanhan Chen, Mingyang Zhang, Yuyan Li, Pengtao Ma, Jingping Wang,\* and Jingyang Niu\*

*Henan Key Laboratory of Polyoxometalate Chemistry, College of Chemistry and Molecular Sciences, Henan University, Kaifeng, Henan 475004, P. R. China*

Fax: +86-371-23886876; E-mail for Jingping Wang: jpwang@henu.edu.cn. and E-mail for Jingyang Niu: jyniu@henu.edu.cn.

## Supporting Information

### Materials and Methods.

#### Synthesis.

#### Synthesis discussion.

#### X-ray crystallographic.

#### Proton conduction experiments

### Tables.

**Table S1.** Summary of all-inorganic Fe<sup>3+</sup>/Fe<sup>2+</sup> contain polyanions.

**Table S2.** Summary of POTas with transition metals and corresponding synthetic methods.

**Table S3.** Crystallographic data and structure refinements for **1**.

**Table S4.** BVS values for Fe atoms in **1**.

**Table S5.** BVS values for O atoms in **1**.

**Table S6.** Possible geometries of six coordinated metal centers.

**Table S7.** Deviation parameters calculated by SHAPE from each ideal polyhedron for Fe atoms in **1**.

**Table S8.** Selected bond lengths (Å) of **1**.

**Table S9.** Bond angles (°) for the central {Fe<sub>10.7</sub>Ta<sub>1.3</sub>O<sub>8</sub>(OH)<sub>8</sub>(H<sub>2</sub>O)<sub>2</sub>} fragment in **1**.

**Table S10.** Data of proton conductivity  $\sigma$  (S·cm<sup>-1</sup>) of **1** at various temperature conditions under 85% RH.

**Table S11.** Calculated and found analyses of Na, K, Ta, and Fe with massic ratios in **1**.

### Figures

**Fig. S1.** Representation of polyanion **1a**.

**Fig. S2.** XPS spectrum of Fe 2p of **1**.

**Fig. S3.** Geometrical configuration of the Fe<sup>3+</sup> cations in **1a**.

**Fig. S4.** The polyhedral representation of {Fe<sub>4.7</sub>Ta<sub>1.3</sub>O<sub>4</sub>} core.

**Fig. S5.** The polyhedral representation of {Fe<sub>10.7</sub>Ta<sub>1.3</sub>O<sub>8</sub>(OH)<sub>8</sub>(H<sub>2</sub>O)<sub>2</sub>} core.

**Fig. S6.** The packing arrangements of polyoxoanion **1a** along the *a*, *b*, and *c*-axis, respectively.

**Fig. S7.** Polyhedral views of the 3D stacking for **1a** along the *c*(a), *b*(b), and *a*(c) axis.

**Fig. S8.** Nyquist plots of **1** under different RHs at 25 °C.

**Fig. S9.** The post-proton conduction, experimental, and simulated PXRD patterns of **1**.

**Fig. S10.** TG curve of **1**.

**Fig. S11.** IR spectra of **1** and  $K_8[Ta_6O_{19}] \cdot 17H_2O$  (**Ta<sub>6</sub>**).

**Materials and Methods.** All other chemicals were commercially purchased and used without further purification. The potassium salt of the  $K_8[Ta_6O_{19}] \cdot 17H_2O$  precursor was synthesized according to the reported literature and confirmed by IR spectrum.<sup>S1</sup> IR spectra of all compounds were recorded on a Bruker VERTEX 70 IR spectrometer using KBr pellets in the range of 4000–500  $cm^{-1}$ . Thermogravimetric analysis (TGA) analyses were performed on a NETZSCH STA 449 F5 Jupiter thermal analyzer in flowing  $N_2$  with a heating rate of 10 °C  $min^{-1}$ . Powder X-ray diffraction (PXRD) data were performed on an X-ray powder diffractometer (Bruker, D8 Advance) using Cu  $K\alpha$  radiation ( $\lambda = 1.5418 \text{ \AA}$ ) collected with the angular range ( $2\theta$ ) from 5° to 45° at room temperature. The proton conduction data was collected by impedance phase gain analyzers Solartron 1260 and 1296. ICP analyses were performed on a PerkinElmer Optima 2000 ICP-OES spectrometer. XPS spectra were measured on Thermo Scientific K-Alpha.

## Synthesis

**Syntheses of  $K_{12}Na_{14}H_{7.4}[Fe_{10.7}Ta_{1.3}O_8(OH)_8(H_2O)_2(Ta_6O_{19})_6] \cdot 114.5H_2O$  (**1**).** 2.01 g of  $K_8[Ta_6O_{19}] \cdot 17H_2O$  was dissolved in 150 mL of  $H_2O$ . Then, a solution of  $FeCl_3 \cdot 6H_2O$  (0.405 g, 2.497 mmol) and 1,10-phenanthroline monohydrate (0.595g, 3.002 mmol) with  $H_2O$  (5 mL) was added dropwise. After stirring for 20 min, the pH was adjusted to 11.7 with 2 mol/L NaOH, and the reaction was kept at 90 °C for 3 h. The resulting mixture was cooled to room temperature and centrifuged. The orange filtrate was transferred to a straight glass tube, and a mixed solvent of  $CH_3CH_2OH/H_2O$  (1:2, volume ratio) was carefully layered onto the orange filtrate. Subsequently, alcohol was carefully layered onto the mixed solvent. Orange block crystals of **1** appeared at the interface after one month (yield: 0.3 % based on Ta). IR (KBr pellets,  $cm^{-1}$ ): 3357 (br), 1646 (s), 917 (s), 865 (s), 759 (w), 709 (s), 548 (s).

## Synthesis discussion

Our initial idea is that organic ligands are added to the reaction system to protect the transition

metals from hydrolysis. Thus,  $\text{FeCl}_3 \cdot 6\text{H}_2\text{O}$  and 1,10-phenanthroline were dissolved in an aqueous solution, firstly. Then, the solution is added dropwise to the  $\text{K}_8[\text{Ta}_6\text{O}_{19}] \cdot 17\text{H}_2\text{O}$  solution. We also tried to synthesize compound **1** without 1,10-phenanthroline ligands, however, the amorphous products were formed. The results indicated that 1,10-phenanthroline acts as base coordinate with transition metal ions to prevent them from being hydrolysis. The experiments reveal that the crystals weren't gained if the 1,10-phenanthroline ligands were replaced by other organic ligands (e.g. 2,2'-bipyridine, 4,4-bipyridine) under the same reaction conditions (including the pH values, the the proportion of organic ligands, transition metals and  $\text{K}_8[\text{Ta}_6\text{O}_{19}] \cdot 17\text{H}_2\text{O}$ ). This may be due to the presence of factors such as the pH of the solution, the proportion of organic ligands, transition metals and  $\text{K}_8[\text{Ta}_6\text{O}_{19}] \cdot 17\text{H}_2\text{O}$ . Notably, 1,10-phenanthroline monohydrate ligands are essential for the formation of **1**, although it does not appear in the structure. The similar phenomenon had often been described in previously reported literatures.<sup>S2</sup>

**X-ray crystallographic.** The suitable single crystal of compound **1** was stucked to the loop for data collection at 150 K. Indexing and data collection were performed on a Bruker D8 VENTURE PHOTON II diffractometer with Mo  $K\alpha$  radiation ( $\lambda = 0.71073 \text{ \AA}$ ). Direct methods successfully located the tungsten atoms, and successive Fourier syntheses revealed the remaining atoms. Refinements were done by full-matrix least-squares on  $F^2$  using the SHELXL-2018 program suite for all data.<sup>S3</sup> In the final refinement, all the non-hydrogen atoms were refined anisotropically. The lattice water molecules were located by using a Fourier map. Some hydrogen atoms on partial water molecules were added, and the rest were directly included in the molecular formula. In addition, the partially occupied Ta19 (0.65) and Fe6 (0.35) atoms are assigned in the final refinement.

**Proton conduction experiments:** AC impedance measurements were performed on Solartron Analytical ModuLab 1260/1296 over the frequency ranging from 1 Hz to 10 MHz. The relative humidity was controlled by a STIK Corp CIHI-150BS3 incubator. The samples were pressed to form a cylindrical pellet of crystalline powder sample ( $\sim 1 \text{ mm thickness} \times 3 \text{ mm diameter}$ ). Two silver electrodes were attached to both sides of the pellet to form four end terminals (quasi-four-probe method). Each humidity equilibrium and the thermal equilibrium were kept for 1.5 h. The ZsimpWin software was used to fit the equivalent circuit of the impedance data. The proton conductivity ( $\sigma$ ) and activation energy ( $E_a$ ) were calculated by the two following equations:

$$\sigma = d/RS \quad (1)$$

$$\sigma T = \sigma_0 \exp(-Ea/K_B T) \quad (2)$$

where  $d$  is the thickness (cm) of the slice,  $S$  is the electrode area (cm<sup>2</sup>),  $R$  is the resistance ( $\Omega$ ),  $\sigma_0$  is the pre-exponential factor,  $T$  represents the absolute temperature, and  $K_B$  is the Boltzmann constant ( $K_B = 8.63 \times 10^{-5}$  eV/K).

**Table S1.** Summary of all-inorganic Fe<sup>3+</sup>/Fe<sup>2+</sup> contain polyanions.

| No.              | Year | Compounds                                                                                                                                                                                                                                                     | Ref. |
|------------------|------|---------------------------------------------------------------------------------------------------------------------------------------------------------------------------------------------------------------------------------------------------------------|------|
| Fe <sub>48</sub> | 2020 | K <sub>36</sub> [Fe <sub>48</sub> (OH) <sub>76</sub> (H <sub>2</sub> O) <sub>16</sub> (HP <sub>2</sub> W <sub>12</sub> O <sub>48</sub> ) <sub>8</sub> ]·400H <sub>2</sub> O                                                                                   | S4   |
| Fe <sub>28</sub> | 2005 | Na <sub>16</sub> K <sub>12</sub> [H <sub>56</sub> P <sub>8</sub> W <sub>48</sub> Fe <sub>28</sub> O <sub>248</sub> ]·ca.90H <sub>2</sub> O                                                                                                                    | S5   |
| Fe <sub>18</sub> | 2011 | (NH <sub>4</sub> ) <sub>12</sub> Cu(H <sub>2</sub> O) <sub>4</sub> [As <sub>2</sub> Fe <sub>6</sub> Mo <sub>22</sub> O <sub>85</sub> (H <sub>2</sub> O)] <sub>3</sub> ·20H <sub>2</sub> O                                                                     | S6   |
| Fe <sub>16</sub> | 2008 | Li <sub>4</sub> K <sub>16</sub> [P <sub>8</sub> W <sub>48</sub> O <sub>184</sub> Fe <sub>16</sub> (OH) <sub>28</sub> (H <sub>2</sub> O) <sub>4</sub> ]·66H <sub>2</sub> O·2KCl                                                                                | S7   |
|                  |      | Na <sub>9</sub> K <sub>11</sub> [P <sub>8</sub> W <sub>48</sub> O <sub>184</sub> Fe <sub>16</sub> (OH) <sub>28</sub> (H <sub>2</sub> O) <sub>4</sub> ]·100H <sub>2</sub> O                                                                                    |      |
| Fe <sub>15</sub> | 2021 | Na <sub>21</sub> [NaFe <sub>15</sub> (OH) <sub>12</sub> (PO <sub>4</sub> ) <sub>4</sub> (A- $\alpha$ -SiW <sub>9</sub> O <sub>34</sub> ) <sub>4</sub> ]·85H <sub>2</sub> O                                                                                    | S8   |
| Fe <sub>14</sub> | 2015 | (CH <sub>6</sub> N <sub>3</sub> )Na <sub>30</sub> [Fe <sub>14</sub> O <sub>6</sub> (OH) <sub>13</sub> (P <sub>2</sub> W <sub>15</sub> O <sub>56</sub> ) <sub>4</sub> ]·105H <sub>2</sub> O·2NaCH <sub>3</sub> COO                                             | S9   |
|                  |      | Cs <sub>4.5</sub> K <sub>14</sub> Na <sub>1.5</sub> [Na <sub>2</sub> Fe <sub>14</sub> (OH) <sub>12</sub> (PO <sub>4</sub> ) <sub>4</sub> (A- $\alpha$ -SiW <sub>9</sub> O <sub>34</sub> ) <sub>4</sub> ]·105H <sub>2</sub> O·2Na <sub>3</sub> PO <sub>4</sub> |      |
|                  |      | Rb <sub>4</sub> Na <sub>16</sub> [Na <sub>2</sub> Fe <sub>14</sub> (OH) <sub>12</sub> (PO <sub>4</sub> ) <sub>4</sub> (A- $\alpha$ -GeW <sub>9</sub> O <sub>34</sub> ) <sub>4</sub> ]·139H <sub>2</sub> O·2Na <sub>3</sub> PO <sub>4</sub>                    |      |
|                  | 2016 | [H <sub>3</sub> Rb <sub>3</sub> Fe <sub>14</sub> (OH) <sub>12</sub> (PO <sub>4</sub> ) <sub>6</sub> (B- $\alpha$ -PW <sub>9</sub> O <sub>34</sub> ) <sub>2</sub> ]·21H <sub>2</sub> O                                                                         | S10  |
| Fe <sub>13</sub> | 2009 | K <sub>8</sub> Na <sub>14</sub> [HMTA] <sub>4</sub> [(Fe <sup>III</sup> <sub>3</sub> Fe <sup>II</sup> <sub>0.25</sub> (OH) <sub>3</sub> )(AsO <sub>4</sub> )(AsW <sub>9</sub> O <sub>34</sub> ) <sub>4</sub> ]·24H <sub>2</sub> O                             | S11  |
| Fe <sub>12</sub> | 2008 | (C <sub>2</sub> N <sub>2</sub> H <sub>10</sub> ) <sub>11</sub> [(B- $\alpha$ -PW <sub>9</sub> O <sub>34</sub> )Fe <sub>3</sub> (OH) <sub>3</sub> ] <sub>4</sub> (PO <sub>4</sub> ) <sub>4</sub> Fe]·38H <sub>2</sub> O                                        | S12  |
| Fe <sub>12</sub> | 2007 | K <sub>21</sub> Na <sub>8</sub> [KFe <sub>12</sub> (OH) <sub>18</sub> ( $\alpha$ -1,2,3-P <sub>2</sub> W <sub>15</sub> O <sub>56</sub> ) <sub>4</sub> ]·70H <sub>2</sub> O                                                                                    | S13  |
| Fe <sub>11</sub> | 2015 | Na <sub>27</sub> [Fe <sub>11</sub> (H <sub>2</sub> O) <sub>14</sub> (OH) <sub>2</sub> (W <sub>3</sub> O <sub>10</sub> ) <sub>2</sub> ( $\alpha$ -SbW <sub>9</sub> O <sub>33</sub> ) <sub>6</sub> ]·103H <sub>2</sub> O                                        | S14  |
| Fe <sub>10</sub> | 2014 | (NH <sub>4</sub> ) <sub>9</sub> Na <sub>19</sub> [Fe <sub>10</sub> Se <sub>8</sub> W <sub>62</sub> O <sub>222</sub> (OH) <sub>18</sub> (H <sub>2</sub> O) <sub>4</sub> ]·42H <sub>2</sub> O                                                                   | S15  |
|                  | 2016 | [Rb <sub>9</sub> Cs <sub>4</sub> H <sub>37</sub> Fe <sub>10</sub> O <sub>34</sub> (A- $\alpha$ -PW <sub>9</sub> O <sub>34</sub> ) <sub>3</sub> (OH) <sub>3</sub> ]·36H <sub>2</sub> O                                                                         | S10  |
| Fe <sub>9</sub>  | 2010 | [EMIM] <sub>8</sub> Na <sub>9</sub> [WFe <sub>9</sub> ( $\mu$ <sub>3</sub> -O) <sub>3</sub> ( $\mu$ <sub>2</sub> -OH) <sub>6</sub> O <sub>4</sub> H <sub>2</sub> O(SiW <sub>9</sub> O <sub>34</sub> ) <sub>3</sub> ]·7H <sub>2</sub> O                        | S16  |
| Fe <sub>8</sub>  | 2022 | Li <sub>48</sub> [(Nb <sub>6</sub> O <sub>19</sub> ) <sub>8</sub> Fe <sub>8</sub> (OH) <sub>8</sub> ]·88H <sub>2</sub> O                                                                                                                                      | S17  |
|                  | 2005 | Na <sub>10</sub> K <sub>6</sub> [H <sub>12</sub> P <sub>4</sub> W <sub>28</sub> Fe <sub>8</sub> O <sub>120</sub> ]·28H <sub>2</sub> O                                                                                                                         | S18  |
|                  | 2008 | K <sub>4</sub> (C <sub>2</sub> N <sub>2</sub> H <sub>10</sub> ) <sub>12</sub> [( $\alpha$ -PW <sub>10</sub> Fe <sub>2</sub> O <sub>39</sub> ) <sub>4</sub> ]·30H <sub>2</sub> O                                                                               | S12  |
| Fe <sub>6</sub>  | 2018 | (NH <sub>4</sub> ) <sub>25</sub> [As <sub>6</sub> Fe <sub>7</sub> Mo <sub>22</sub> O <sub>98</sub> ]·13H <sub>2</sub> O                                                                                                                                       | S19  |
|                  | 1994 | Na <sub>3</sub> (NH <sub>4</sub> ) <sub>12</sub> [Mo <sub>57</sub> Fe <sub>6</sub> (NO) <sub>6</sub> O <sub>174</sub> (OH) <sub>3</sub> (H <sub>2</sub> O) <sub>2</sub> ]·76H <sub>2</sub> O                                                                  | S20  |
|                  | 2005 | Cs <sub>4</sub> Na <sub>7</sub> [Fe <sub>6</sub> (OH) <sub>3</sub> (A- $\alpha$ -GeW <sub>9</sub> O <sub>34</sub> (OH) <sub>3</sub> ) <sub>2</sub> ]·30H <sub>2</sub> O                                                                                       | S21  |
|                  | 2006 | K <sub>7</sub> [(CH <sub>3</sub> ) <sub>2</sub> (NH <sub>2</sub> ) <sub>8</sub> ]{Fe <sub>2</sub> (OH) <sub>3</sub> (H <sub>2</sub> O) <sub>2</sub> } <sub>3</sub> ( $\gamma$ -SiW <sub>10</sub> O <sub>36</sub> ) <sub>3</sub> ]·31H <sub>2</sub> O          | S22  |
|                  | 2009 | (H <sub>2</sub> en) <sub>2.5</sub> H <sub>9</sub> [Fe <sub>6</sub> Ge <sub>3</sub> W <sub>24</sub> O <sub>94</sub> (H <sub>2</sub> O) <sub>2</sub> ]·14H <sub>2</sub> O                                                                                       | S23  |
|                  | 2012 | (NH <sub>4</sub> ) <sub>16</sub> [As <sub>2</sub> Fe <sub>6</sub> Mo <sub>20</sub> O <sub>80</sub> (H <sub>2</sub> O) <sub>2</sub> ]·18H <sub>2</sub> O                                                                                                       | S24  |
|                  | 2013 | [dapH <sub>2</sub> ] <sub>5</sub> [Fe <sub>4</sub> (H <sub>2</sub> O) <sub>2</sub> (FeW <sub>9</sub> O <sub>34</sub> ) <sub>2</sub> ]·11H <sub>2</sub> O                                                                                                      | S25  |
|                  |      | [dapH <sub>2</sub> ] <sub>3</sub> [enH <sub>2</sub> ][enH]Na[Fe <sub>4</sub> (H <sub>2</sub> O) <sub>2</sub> (FeW <sub>9</sub> O <sub>34</sub> ) <sub>2</sub> ]·7H <sub>2</sub> O                                                                             |      |

|                 |      |                                                                                           |     |
|-----------------|------|-------------------------------------------------------------------------------------------|-----|
|                 | 2014 | $(C_2H_8N)_4Na_{14}[Fe_6Se_6W_{34}O_{124}(OH)_{16}] \cdot 44H_2O$                         | S15 |
| Fe <sub>5</sub> | 2012 | $(NH_4)_{17}[As_2Fe_5Mo_{21}O_{82}] \cdot 14H_2O$                                         | S24 |
| Fe <sub>4</sub> | 2000 | $Rb_{12}(SiW_{10}O_{37})_2Fe_4(OH)_4 \cdot 28H_2O$                                        | S26 |
|                 | 2002 | $Na_6[Fe_4(H_2O)_{10}(\beta-AsW_9O_{33})_2] \cdot 32H_2O$                                 | S27 |
|                 |      | $Na_6[Fe_4(H_2O)_{10}(\beta-SbW_9O_{33})_2] \cdot 32H_2O$                                 |     |
|                 |      | $Cs_4[Fe_4(H_2O)_{10}(\beta-SeW_9O_{33})_2] \cdot 21H_2O$                                 |     |
|                 |      | $Cs_{3.8}K_{0.2}[Fe_4(H_2O)_{10}(\beta-TeW_9O_{33})_2]$                                   |     |
|                 | 2007 | $K_{14}[\alpha-GeFe_2W_{10}O_{38}(OH)]_2 \cdot 34H_2O$                                    | S28 |
|                 | 2007 | $Na_6[Fe_4(H_2O)_{10}(\beta-AsW_9O_{33})_2] \cdot 32H_2O$                                 | S29 |
|                 |      | $Na_6[Fe_4(H_2O)_{10}(\beta-SbW_9O_{33})_2] \cdot 32H_2O$                                 |     |
|                 |      | $Cs_4[Fe_4(H_2O)_{10}(\beta-SeW_9O_{33})_2] \cdot 21H_2O$                                 |     |
|                 |      | $Cs_{3.8}K_{0.2}[Fe_4(H_2O)_{10}(\beta-TeW_9O_{33})_2] \cdot 32H_2O$                      |     |
|                 | 2008 | $[enH_2]_3[Fe^{III}_4(H_2O)_8(SbW_9O_{33})_2] \cdot 20H_2O$                               | S30 |
|                 | 2020 | $(H_2btp)_4[Fe^{III}_2Fe^{II}_2(H_2O)_2(AsW_9O_{34})_2] \cdot 4H_2O$                      | S31 |
|                 | 2006 | $Rb_{11}[\{\beta-SiFe_2W_{10}O_{37}(OH)(H_2O)\}_2(\mu-OH)] \cdot 20H_2O \cdot 0.5RbCl$    | S22 |
| Fe <sub>3</sub> | 2001 | $Na_9[Fe_3(H_2O)_3(BiW_9O_{33})_2] \cdot 37H_2O$                                          | S32 |
|                 | 2002 | $\alpha-Na_{11}[(FeCl)_2(FeOH)_2P_2W_{15}O_{59}] \cdot 14H_2O$                            | S33 |
|                 |      | $\alpha-Na_9[(FeOH)_2P_2W_{15}O_{59}] \cdot 19H_2O$                                       |     |
|                 |      | $Na_{14}[aa\beta\alpha-(NaOH)_2(FeOH)_2Fe_2(P_2W_{15}O_{56})_2] \cdot 20H_2O$             |     |
|                 |      | $[(CH_3CH_2CH_2CH_2)_4N]_{15}[aa\beta\alpha-Fe_3(P_2W_{15}O_{56})_2]$                     |     |
|                 | 2003 | $\alpha\beta\beta\alpha-Na_{12}(Fe^{III}OH)_2Fe^{III}_2(As_2W_{15}O_{56})_2$              | S34 |
|                 | 2003 | $\alpha\beta\beta\alpha-Na_{14}[(NaOH)_2(Fe^{III}OH)_2(Fe^{III})_2(P_2W_{15}O_{56})_2]$   | S35 |
|                 |      | $\alpha\beta\beta\alpha-Na_{14}[(NaOH)_2(Fe^{III}OH)_2(Fe^{III})_2(As_2W_{15}O_{56})_2]$  |     |
|                 | 2004 | $K_9[(Fe^{III}(OH)_2)_3(A-\alpha-PW_9O_{34})_2]$                                          | S36 |
|                 | 2004 | $K_4Na_7[(\alpha-SiFe_3W_9(OH)_3O_{34})_2(OH)_3]$                                         | S37 |
|                 |      | $K_2Na_6[(\alpha-Si(FeOH)_2)FeW_9(OH)_3O_{34})_2]$                                        |     |
|                 | 2005 | $K_4Na_7[(\beta-SiFe_3W_9(OH)_3O_{34})_2(OH)_3]$                                          | S38 |
| Fe <sub>2</sub> | 2001 | $H_2Na_{14}[Fe^{III}_2(NaOH)_2(P_2W_{15}O_{56})_2]$                                       | S39 |
|                 | 2007 | $Cs_3K_9[K(H_2O)(\beta-Fe_2GeW_{10}O_{37}(OH))(\gamma-GeW_{10}O_{36})] \cdot 19H_2O$      | S40 |
|                 |      | $Cs_7K_4Na[\{\beta-Fe_2GeW_{10}O_{37}(OH)_2\}_2] \cdot 39H_2O$                            |     |
|                 | 2008 | $K_8[(CH_3)_2NH_2]_5[(\beta-SiFe_2W_{10}O_{37}(OH))(\gamma-SiW_{10}O_{36})] \cdot 17H_2O$ | S41 |
|                 | 2009 | $(NH_4)_{12}[Fe_2(AsMo_7O_{27})_2] \cdot 12H_2O$                                          | S42 |
|                 | 2012 | $Fe(H_2O)_6H[Na_6FeW_{12}O_{40}]_2 \cdot 44H_2O$                                          | S43 |
|                 | 2016 | $Cs_3K_4H_2[(Si_2W_{18}Ta_6O_{78})FeCl_2(H_2O)_2] \cdot 15H_2O$                           | S44 |
|                 | 2016 | $[Fe_2(AsMo_7O_{27})_2](H_2en)_2(NH_4)_8 \cdot 6H_2O$                                     | S45 |
|                 | 2017 | $Na_{16}[(NaOH)_2Fe^{III}_2(As_2W_{15}O_{56})_2] \cdot 54H_2O$                            | S46 |

|    |      |                                                                                                                                                                                                          |     |
|----|------|----------------------------------------------------------------------------------------------------------------------------------------------------------------------------------------------------------|-----|
|    | 2020 | (H <sub>2</sub> bpp) <sub>2</sub> [Na <sub>4</sub> Fe(H <sub>2</sub> O) <sub>7</sub> ][Fe(P <sub>4</sub> Mo <sub>6</sub> O <sub>31</sub> H <sub>6</sub> ) <sub>2</sub> ] <sub>2</sub> ·2H <sub>2</sub> O | S47 |
|    |      | (H <sub>2</sub> bpp) <sub>6</sub> (bpp) <sub>2</sub> [Fe(P <sub>4</sub> Mo <sub>6</sub> O <sub>31</sub> H <sub>8</sub> ) <sub>2</sub> ] <sub>2</sub> ·13H <sub>2</sub> O                                 |     |
|    | 2003 | αααα-H <sub>2</sub> Na <sub>14</sub> [(NaOH) <sub>2</sub> Fe <sup>III</sup> <sub>2</sub> (As <sub>2</sub> W <sub>15</sub> O <sub>56</sub> ) <sub>2</sub> ]                                               | S35 |
| Fe | 2020 | [C <sub>16</sub> H <sub>33</sub> (CH <sub>3</sub> ) <sub>3</sub> N] <sub>10</sub> [(PW <sub>11</sub> FeO <sub>39</sub> ) <sub>2</sub> O]·3.5H <sub>2</sub> O                                             | S48 |
|    |      | [(C <sub>2</sub> H <sub>5</sub> ) <sub>4</sub> N] <sub>10</sub> [(PW <sub>11</sub> FeO <sub>39</sub> ) <sub>2</sub> O]·3H <sub>2</sub> O                                                                 |     |
|    |      | [(CH <sub>3</sub> ) <sub>4</sub> N] <sub>10</sub> [(PW <sub>11</sub> FeO <sub>39</sub> ) <sub>2</sub> O]·4H <sub>2</sub> O                                                                               |     |

**Table S2.** Summary of POTas with transition metals and corresponding synthetic methods.

| No. | Compounds                                                                                                                                    | Synthetic method                              | Reagents and Precursor                                                                                                                           | Ref. |
|-----|----------------------------------------------------------------------------------------------------------------------------------------------|-----------------------------------------------|--------------------------------------------------------------------------------------------------------------------------------------------------|------|
| 1   | K <sub>7</sub> [Re(CO) <sub>3</sub> Ta <sub>6</sub> O <sub>19</sub> ]                                                                        | Reflux 60 °C for 2.5 h under N <sub>2</sub>   | [Re(CO) <sub>3</sub> (CH <sub>3</sub> CN) <sub>3</sub> ]ClO <sub>4</sub><br>K <sub>8</sub> [Ta <sub>6</sub> O <sub>19</sub> ]·17H <sub>2</sub> O | S49  |
| 2   | K <sub>7</sub> [Mn(CO) <sub>3</sub> Ta <sub>6</sub> O <sub>19</sub> ]                                                                        | Reflux 60 °C for 2.5 h under N <sub>2</sub>   | [Mn(CO) <sub>3</sub> (CH <sub>3</sub> CN) <sub>3</sub> ]ClO <sub>4</sub><br>K <sub>8</sub> [Ta <sub>6</sub> O <sub>19</sub> ]·17H <sub>2</sub> O | S49  |
| 3   | <i>cis</i> -K <sub>6</sub> [{Mn(CO) <sub>3</sub> } <sub>2</sub> Ta <sub>6</sub> O <sub>19</sub> ]                                            | Reflux 100 °C for 2 h                         | [Mn(CO) <sub>3</sub> (CH <sub>3</sub> CN) <sub>3</sub> ]ClO <sub>4</sub><br>K <sub>8</sub> [Ta <sub>6</sub> O <sub>19</sub> ]·17H <sub>2</sub> O | S49  |
| 4   | <i>trans</i> -K <sub>4</sub> Na <sub>2</sub> [{Re(CO) <sub>3</sub> } <sub>2</sub> Ta <sub>6</sub> O <sub>19</sub> ]                          | Reflux 100 °C for 1 h                         | [Re(CO) <sub>3</sub> (CH <sub>3</sub> CN) <sub>3</sub> ]ClO <sub>4</sub><br>K <sub>8</sub> [Ta <sub>6</sub> O <sub>19</sub> ]·17H <sub>2</sub> O | S49  |
| 5   | {[Cu(1,3-dap) <sub>2</sub> ] <sub>2</sub> [Cu(1,3-dap)(H <sub>2</sub> O)] <sub>2</sub> [Ta <sub>6</sub> O <sub>19</sub> ]}·8H <sub>2</sub> O | Diffusion                                     | CuI, pyrazine, 1,3-dap<br>K <sub>8</sub> [Ta <sub>6</sub> O <sub>19</sub> ]·17H <sub>2</sub> O                                                   | S50  |
| 6   | [Cu(en) <sub>2</sub> ] <sub>4</sub> [Ta <sub>6</sub> O <sub>19</sub> ]·14H <sub>2</sub> O                                                    | Diffusion                                     | Cu(CH <sub>3</sub> COOH) <sub>2</sub> ·H <sub>2</sub> O, en<br>K <sub>8</sub> [Ta <sub>6</sub> O <sub>19</sub> ]·17H <sub>2</sub> O              | S50  |
| 7   | Na <sub>10</sub> [{(C <sub>6</sub> H <sub>6</sub> )RuTa <sub>6</sub> O <sub>18</sub> } <sub>2</sub> (μ-O)]·39.4H <sub>2</sub> O              | 80 °C for 8 h                                 | [(C <sub>6</sub> H <sub>6</sub> )RuCl <sub>2</sub> ] <sub>2</sub><br>Na <sub>8</sub> [Ta <sub>6</sub> O <sub>19</sub> ]·24.5H <sub>2</sub> O     | S51  |
| 8   | Na <sub>4</sub> ( <i>trans</i> -[{(C <sub>6</sub> H <sub>6</sub> )Ru} <sub>2</sub> Ta <sub>6</sub> O <sub>19</sub> ])·20H <sub>2</sub> O     | 80 °C for 8 h                                 | [(C <sub>6</sub> H <sub>6</sub> )RuCl <sub>2</sub> ] <sub>2</sub><br>Na <sub>8</sub> [Ta <sub>6</sub> O <sub>19</sub> ]·24.5H <sub>2</sub> O     | S51  |
| 9   | Cs <sub>4</sub> [(Cp*Rh) <sub>2</sub> Ta <sub>6</sub> O <sub>19</sub> ]·18H <sub>2</sub> O                                                   | 80 °C for 8 h                                 | [Cp*RhCl <sub>2</sub> ] <sub>2</sub><br>Cs <sub>8</sub> [Ta <sub>6</sub> O <sub>19</sub> ]·14H <sub>2</sub> O                                    | S52  |
| 10  | TMA <sub>8</sub> Ti <sub>2</sub> Ta <sub>8</sub> O <sub>28</sub> ·21H <sub>2</sub> O                                                         | Hydrothermal (140°C for 16 h), postprocessing | TMAOH·5H <sub>2</sub> O,<br>Ti{OCH(CH <sub>3</sub> ) <sub>2</sub> } <sub>4</sub> ,<br>Ta <sub>2</sub> O <sub>5</sub> ·nH <sub>2</sub> O          | S53  |
| 11  | TMA <sub>10</sub> Ti <sub>12</sub> Ta <sub>6</sub> O <sub>44</sub> ·39H <sub>2</sub> O                                                       | Hydrothermal (150°C for 16 h), postprocessing | TMAOH·5H <sub>2</sub> O,<br>Ti{OCH(CH <sub>3</sub> ) <sub>2</sub> } <sub>4</sub> ,<br>Ta <sub>2</sub> O <sub>5</sub> ·nH <sub>2</sub> O          | S53  |
| 12  | Na <sub>6</sub> [(Cp*Ir) <sub>2</sub> Ta <sub>6</sub> O <sub>19</sub> ]·27H <sub>2</sub> O                                                   | 60 °C for 48 h                                | [Cp*IrCl <sub>2</sub> ] <sub>2</sub><br>Na <sub>8</sub> [Ta <sub>6</sub> O <sub>19</sub> ]·24.5H <sub>2</sub> O                                  | S54  |
| 13  | Na <sub>4</sub> [(Cp*Ir) <sub>2</sub> Ta <sub>6</sub> O <sub>19</sub> ]·24H <sub>2</sub> O                                                   | 60 °C for 48 h                                | [Cp*IrCl <sub>2</sub> ] <sub>2</sub><br>Na <sub>8</sub> [Ta <sub>6</sub> O <sub>19</sub> ]·24.5H <sub>2</sub> O                                  | S54  |
| 14  | Na <sub>4</sub> [ <i>trans</i> -{(Cp*Rh) <sub>2</sub> Ta <sub>6</sub> O <sub>19</sub> }]·24H <sub>2</sub> O                                  | 80°C for 24 h                                 | [Cp*RhCl <sub>2</sub> ] <sub>2</sub><br>Na <sub>8</sub> [Ta <sub>6</sub> O <sub>19</sub> ]·24.5H <sub>2</sub> O                                  | S55  |

|    |                                                                                                                                                                                                                           |                                               |                                                                                                                                                                                                                                                          |     |
|----|---------------------------------------------------------------------------------------------------------------------------------------------------------------------------------------------------------------------------|-----------------------------------------------|----------------------------------------------------------------------------------------------------------------------------------------------------------------------------------------------------------------------------------------------------------|-----|
| 15 | $\text{Na}_8\text{K}_7[(\text{Ta}_6\text{O}_{19})_4\text{H}_5\text{Co}_8\text{O}_4] \cdot 45\text{H}_2\text{O}$                                                                                                           | 90 °C for 3 h                                 | $\text{CoCl}_2 \cdot 6\text{H}_2\text{O}$<br>$\text{K}_8[\text{Ta}_6\text{O}_{19}] \cdot 17\text{H}_2\text{O}$                                                                                                                                           | S56 |
| 16 | $\text{Na}_4(\text{NH}_4)_2$<br>$[(\text{Ta}_6\text{O}_{19})\text{Co}(\text{H}_2\text{O})_3] \cdot 20\text{H}_2\text{O}$                                                                                                  | 90 °C for 3 h                                 | $\text{CoCl}_2 \cdot 6\text{H}_2\text{O}$ , $\text{NH}_3$<br>$\text{K}_8[\text{Ta}_6\text{O}_{19}] \cdot 17\text{H}_2\text{O}$                                                                                                                           | S57 |
| 17 | $\text{Na}_4\text{K}_6[(\text{Ta}_6\text{O}_{19})\text{Co}(\text{en})]_2 \cdot 30\text{H}_2\text{O}$                                                                                                                      | 90 °C for 3 h                                 | $\text{CoCl}_2 \cdot 6\text{H}_2\text{O}$ , en<br>$\text{K}_8[\text{Ta}_6\text{O}_{19}] \cdot 17\text{H}_2\text{O}$                                                                                                                                      | S57 |
| 18 | $\{[\text{CuL}]_2[\text{CuL}_2][\text{Ta}_6\text{O}_{19}]\} \cdot 21\text{H}_2\text{O}$                                                                                                                                   | 60 °C for 8 h                                 | $\text{Na}_4\text{P}_2\text{O}_7$ , 1,10-phen,<br>$\text{Cu}(\text{NO}_3)_2 \cdot 3\text{H}_2\text{O}$ ,<br>$\text{K}_8[\text{Ta}_6\text{O}_{19}] \cdot 17\text{H}_2\text{O}$                                                                            | S58 |
| 19 | $\{[\text{CuL}'_2][\text{CuL}'_2][\text{Ta}_6\text{O}_{19}]\} \cdot 20\text{H}_2\text{O}$                                                                                                                                 | 60 °C for 8 h                                 | $\text{Na}_4\text{P}_2\text{O}_7$ , 2,2'-bipy,<br>$\text{Cu}(\text{NO}_3)_2 \cdot 3\text{H}_2\text{O}$ ,<br>$\text{K}_8[\text{Ta}_6\text{O}_{19}] \cdot 17\text{H}_2\text{O}$                                                                            | S58 |
| 20 | $\text{H}_2[\text{Cu}(\text{en})_2$<br>$(\text{H}_2\text{O})_2]\{[\text{Cu}(\text{en})_2]_4[\text{Cu}(\text{en})(\text{Ta}_6\text{O}_9)]_2\} \cdot 14\text{H}_2\text{O}$                                                  | Hydrothermal (100 °C for 3 days)              | $\text{Na}_8[\text{Ta}_6\text{O}_{19}] \cdot 24.5\text{H}_2\text{O}$ ,<br>$\text{CrCl}_3 \cdot 6\text{H}_2\text{O}$ , $\text{CuSCN}$ , $\text{C}_4\text{H}_8\text{O}_2$ ,<br>en,<br>$\text{Na}_8[\text{Ta}_6\text{O}_{19}] \cdot 24.5\text{H}_2\text{O}$ | S57 |
| 21 | $\text{H}_2\{[\text{Cu}(\text{en})_2]_3$<br>$[\text{Cu}(\text{en})(\text{H}_2\text{O})_2\text{Cu}(\text{en})(\text{Ta}_6\text{O}_{19})]_2\} \cdot 30\text{H}_2\text{O}$                                                   | Structural transformations triggered by water | $\text{H}_2[\text{Cu}(\text{en})_2$<br>$(\text{H}_2\text{O})_2]\{[\text{Cu}(\text{en})_2]_4[\text{Cu}(\text{en})(\text{Ta}_6\text{O}_{19})]_2\} \cdot 14\text{H}_2\text{O}$                                                                              | S59 |
| 22 | $\text{H}_2[\text{Cu}(\text{enMe})_2(\text{H}_2\text{O})_2]$<br>$[\text{Na}_2(\text{H}_2\text{O})_{10}]_2\{[\text{Cu}(\text{enMe})_2]_2[\text{Cu}(\text{enMe})(\text{Ta}_6\text{O}_{19})]_2\} \cdot 26\text{H}_2\text{O}$ | Hydrothermal (100 °C for 3 days)              | $\text{CrCl}_3 \cdot 6\text{H}_2\text{O}$ , $\text{CuSCN}$ , $\text{C}_4\text{H}_8\text{O}_2$ ,<br>enMe, $\text{Na}_8[\text{Ta}_6\text{O}_{19}] \cdot 24.5\text{H}_2\text{O}$                                                                            | S59 |
| 23 | $\text{H}_4$<br>$[\text{Na}_4(\text{H}_2\text{O})_{18}]\{[\text{Cu}(\text{enMe})_2]_2[\text{Cu}(\text{enMe})(\text{Ta}_6\text{O}_{19})]_2\} \cdot 10\text{H}_2\text{O}$                                                   | Structural transformations triggered by water | $\text{H}_2[\text{Cu}(\text{enMe})_2(\text{H}_2\text{O})_2]$<br>$[\text{Na}_2(\text{H}_2\text{O})_{10}]_2\{[\text{Cu}(\text{enMe})_2]_2[\text{Cu}(\text{enMe})(\text{Ta}_6\text{O}_{19})]_2\} \cdot 26\text{H}_2\text{O}$                                | S59 |
| 24 | $\text{H}_2[\text{Cu}(\text{en})_2(\text{H}_2\text{O})_2]\{[\text{Cu}(\text{en})_2]_2[\text{Na}_2(\text{H}_2\text{O})_7]_2[\text{Cu}(\text{en})(\text{Ta}_6\text{O}_{19})]_2\} \cdot 10\text{H}_2\text{O}$                | Hydrothermal (100 °C for 3 days)              | $\text{CrCl}_3 \cdot 6\text{H}_2\text{O}$ , $\text{Na}_2\text{MoO}_4 \cdot 2\text{H}_2\text{O}$ ,<br>$\text{CuSCN}$ , $\text{C}_4\text{H}_8\text{O}_2$ , en,<br>$\text{Na}_8[\text{Ta}_6\text{O}_{19}] \cdot 24.5\text{H}_2\text{O}$                     | S59 |
| 25 | $\text{H}_2[\text{Na}_2(\text{H}_2\text{O})_{10}]_2[\text{Cu}(\text{en})_2]_2\{[\text{Cu}(\text{en})_2][\text{Cu}(\text{en})(\text{Ta}_6\text{O}_{19})]_2\} \cdot 8\text{H}_2\text{O}$                                    | Hydrothermal (100 °C for 3 days)              | $\text{CrCl}_3 \cdot 6\text{H}_2\text{O}$ , $\text{NaBO}_3 \cdot 4\text{H}_2\text{O}$ ,<br>$\text{CuSCN}$<br>$\text{NaCO}_3/\text{NaHCO}_3$ (0.5M, pH=10.5) buffer solution, en,<br>$\text{Na}_8[\text{Ta}_6\text{O}_{19}] \cdot 24.5\text{H}_2\text{O}$ | S59 |
| 26 | $\text{K}_4\{[\text{Cu}(\text{cyclam})]_2\text{Ta}_6\text{O}_{19}\} \cdot 18\text{H}_2\text{O}$                                                                                                                           | Diffusion                                     | $\text{Cu}(\text{NO}_3)_2 \cdot 3\text{H}_2\text{O}$ , cyclam,<br>$\text{K}_8\{\text{Ta}_6\text{O}_{19}\} \cdot 16\text{H}_2\text{O}$                                                                                                                    | S60 |
| 27 | $\text{K}_4\{[\text{Zn}(\text{cyclam})]_2\text{Ta}_6\text{O}_{19}\} \cdot 18\text{H}_2\text{O}$                                                                                                                           | Diffusion                                     | $\text{Zn}(\text{NO}_3)_2 \cdot 6\text{H}_2\text{O}$ , cyclam,<br>$\text{K}_8\{\text{Ta}_6\text{O}_{19}\} \cdot 16\text{H}_2\text{O}$                                                                                                                    | S60 |
| 28 | $\{[\text{Cd}(\text{cyclam})]_4\text{Ta}_6\text{O}_{19}\} \cdot 19\text{H}_2\text{O}$                                                                                                                                     | Diffusion                                     | $\text{Cd}(\text{NO}_3)_2 \cdot 4\text{H}_2\text{O}$ , cyclam,<br>$\text{K}_8\{\text{Ta}_6\text{O}_{19}\} \cdot 16\text{H}_2\text{O}$                                                                                                                    | S60 |

1,3-dap=1,3-diaminopropane;<sup>S50</sup> en=ethylenediamine;<sup>S50, S57, S59</sup> Cp\* =  $\eta^5\text{-C}_5(\text{CH}_3)_5$ ;<sup>S54</sup> L = 1,10-phen;<sup>S58</sup> L' = 2,2'-bipy;<sup>S58</sup> enMe = 1,2-diaminopropane;<sup>S59</sup>  $\text{C}_4\text{H}_8\text{O}_2$  = 1,4-dioxane;<sup>S59</sup> cyclam=1,4,8,11-tetraazacyclotetradecane;<sup>S60</sup>

**Table S3.** Crystallographic data and structure refinements for **1**.

| <b>1</b>                                                                    |                                                                                               |
|-----------------------------------------------------------------------------|-----------------------------------------------------------------------------------------------|
| Empirical formula                                                           | $\text{K}_{12}\text{Na}_{14}\text{H}_{248.4}\text{Fe}_{10.7}\text{Ta}_{37.3}\text{O}_{246.5}$ |
| Formula weight                                                              | 12332.47                                                                                      |
| Temperature / K                                                             | 150                                                                                           |
| Crystal system                                                              | triclinic                                                                                     |
| Space group                                                                 | <i>P</i> -1                                                                                   |
| <i>a</i> [Å]                                                                | 18.011(18)                                                                                    |
| <i>b</i> [Å]                                                                | 19.645(19)                                                                                    |
| <i>c</i> [Å]                                                                | 20.630(17)                                                                                    |
| $\alpha$ [°]                                                                | 113.52(2)                                                                                     |
| $\beta$ [°]                                                                 | 94.90(2)                                                                                      |
| $\gamma$ [°]                                                                | 113.32(3)                                                                                     |
| <i>V</i> [Å <sup>3</sup> ]                                                  | 5883(9)                                                                                       |
| <i>Z</i>                                                                    | 1                                                                                             |
| $\rho_{\text{calcd}}$ [g cm <sup>-3</sup> ]                                 | 3.481                                                                                         |
| $\mu$ [mm <sup>-1</sup> ]                                                   | 18.260                                                                                        |
| <i>F</i> (000)                                                              | 5604.0                                                                                        |
| Index ranges                                                                | $-21 \leq h \leq 21$<br>$-23 \leq k \leq 23$<br>$-24 \leq l \leq 24$                          |
| Reflections collected                                                       | 127309                                                                                        |
| Independent reflections                                                     | 21832<br>[ <i>R</i> <sub>int</sub> = 0.0504]                                                  |
| data/restraints/ parameters                                                 | 21832/193/1435                                                                                |
| Goodness-of-fit on <i>F</i> <sup>2</sup>                                    | 1.012                                                                                         |
| <i>R</i> <sub>1</sub> , <i>wR</i> <sub>2</sub> [ <i>I</i> > 2σ( <i>I</i> )] | 0.0282, 0.0595                                                                                |
| <i>R</i> <sub>1</sub> , <i>wR</i> <sub>2</sub> [all data]                   | 0.0358, 0.0632                                                                                |
| Largest diff. Peak/hole/e Å <sup>-3</sup>                                   | 2.52/-1.26                                                                                    |

**Table S4.** BVS values for Fe atoms in **1**.

| Atoms | BVS value | Atoms | BVS value | Atoms | BVS value |
|-------|-----------|-------|-----------|-------|-----------|
| Fe1   | 2.89      | Fe3   | 2.87      | Fe5   | 3.09      |
| Fe2   | 2.80      | Fe4   | 2.82      | Fe6   | 3.19      |

**Table S5.** BVS values for O atoms in **1**.

| Atoms | BVS value | Atoms | BVS value | Atoms | BVS value |
|-------|-----------|-------|-----------|-------|-----------|
| O23   | 0.98      | O47   | 0.98      | O49   | 0.96      |
| O6    | 0.97      | O1W   | 0.51      |       |           |



**Table S6.** Possible geometries of six coordinated metal centers.

| Geometry | Point group | Polyhedron                    |
|----------|-------------|-------------------------------|
| HP-6     | $D_{6h}$    | Hexagon                       |
| PPY-6    | $C_{5v}$    | Pentagonal pyramid            |
| OC-6     | $O_h$       | Octahedron                    |
| TPR-6    | $D_{3h}$    | Trigonal prism                |
| JPPY-6   | $C_{5v}$    | Johnson pentagonal pyramid J2 |

**Table S7.** Deviation parameters calculated by SHAPE from each ideal polyhedron for Fe atoms in **1**.

|        | Fe1    | Fe2    | Fe3    | Fe4    | Fe5    | Fe6    |
|--------|--------|--------|--------|--------|--------|--------|
| HP-6   | 30.567 | 32.532 | 31.246 | 31.536 | 30.115 | 32.141 |
| PPY-6  | 27.823 | 25.851 | 24.249 | 24.915 | 28.194 | 28.973 |
| OC-6   | 0.358  | 0.500  | 1.572  | 1.494  | 0.854  | 0.564  |
| TPR-6  | 15.440 | 12.202 | 10.614 | 10.828 | 15.681 | 15.949 |
| JPPY-6 | 31.468 | 29.618 | 27.360 | 28.120 | 31.469 | 32.454 |

**Table S8.** Selected bond lengths (Å) of **1**.

| Bond    | Length   | Bond    | Length   | Bond    | Length   |
|---------|----------|---------|----------|---------|----------|
| Fe1-O4  | 2.079(6) | Fe3-O3  | 2.095(6) | Fe5-O1  | 2.165(6) |
| Fe1-O9  | 2.087(6) | Fe3-O14 | 2.146(6) | Fe5-O10 | 1.828(6) |
| Fe1-O10 | 1.929(6) | Fe3-O20 | 1.972(6) | Fe5-O46 | 2.085(6) |
| Fe1-O10 | 2.012(6) | Fe3-O23 | 1.993(6) | Fe5-O48 | 2.080(6) |
| Fe1-O47 | 2.040(6) | Fe3-O45 | 2.124(6) | Fe5-O50 | 1.979(6) |
| Fe1-O49 | 2.051(6) | Fe3-O53 | 1.923(6) | Fe5-O53 | 1.986(6) |
| Fe2-O6  | 2.061(6) | Fe4-O2  | 2.107(6) | Fe6-O1W | 2.353(6) |
| Fe2-O23 | 2.055(6) | Fe4-O6  | 1.998(6) | Fe6-O9  | 1.831(6) |
| Fe2-O24 | 2.055(6) | Fe4-O8  | 2.113(6) | Fe6-O27 | 2.023(6) |
| Fe2-O47 | 2.008(6) | Fe4-O21 | 2.012(6) | Fe6-O50 | 1.960(6) |
| Fe2-O49 | 2.011(6) | Fe4-O50 | 1.923(6) | Fe6-O53 | 1.964(6) |
| Fe2-O61 | 2.060(6) | Fe4-O59 | 2.113(6) | Fe6-O60 | 2.003(6) |

**Table S9.** Bond angles (°) for the central  $\{\text{Fe}_{10.7}\text{Ta}_{1.3}\text{O}_8(\text{OH})_8(\text{H}_2\text{O})_2\}$  fragment in **1**.

| Bond        | Angle    | Bond        | Angle    |
|-------------|----------|-------------|----------|
| Fe4-O6-Fe2  | 131.7(3) | Fe4-O50-Fe6 | 139.9(3) |
| Fe6-O9-Fe1  | 130.9(3) | Fe6-O50-Fe5 | 95.4(3)  |
| Fe1-O10-Fe1 | 98.6(3)  | Fe3-O53-Fe5 | 124.4(3) |
| Fe5-O10-Fe1 | 126.9(3) | Fe3-O53-Fe6 | 140.2(3) |
| Fe5-O10-Fe1 | 134.5(3) | Fe6-O53-Fe5 | 95.1(3)  |
| Fe3-O23-Fe2 | 132.3(3) | Fe2-O49-Fe1 | 129.9(3) |
| Fe2-O47-Fe1 | 130.3(3) | Fe4-O50-Fe5 | 124.1(3) |

**Table S10.** Data of proton conductivity  $\sigma$  ( $\text{S}\cdot\text{cm}^{-1}$ ) of **1** at various temperature conditions under 85% RH.

| T ( $^{\circ}\text{C}$ ) | <b>1</b>             |
|--------------------------|----------------------|
| 25                       | $9.24\times 10^{-4}$ |
| 35                       | $1.68\times 10^{-3}$ |
| 45                       | $2.47\times 10^{-3}$ |
| 55                       | $4.29\times 10^{-3}$ |
| 65                       | $8.52\times 10^{-3}$ |
| 75                       | $1.59\times 10^{-2}$ |
| 85                       | $2.61\times 10^{-2}$ |

**Table S11.** Calculated and found analyses of Na, K, Ta, and Fe with massic ratios in **1**.

|       | Na (%) | K (%) | Ta (%) | Fe (%) |
|-------|--------|-------|--------|--------|
| calcd | 2.61   | 3.80  | 54.73  | 4.85   |
| found | 2.65   | 4.07  | 59.00  | 5.13   |

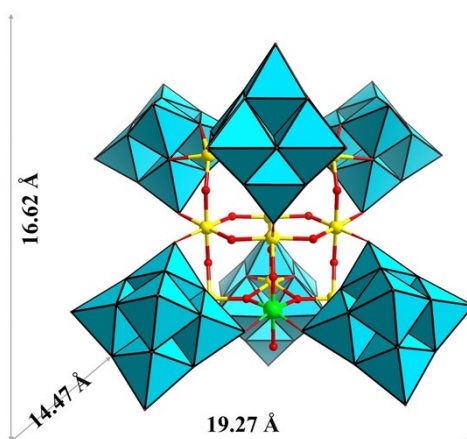

**Fig. S1.** Representation of polyanion **1a**.

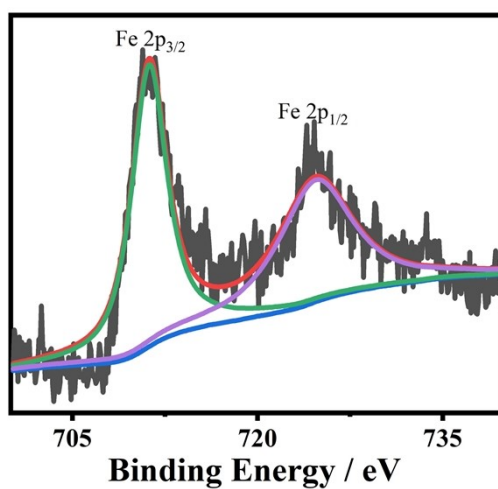

**Fig. S2.** XPS spectrum of Fe 2p of **1**.

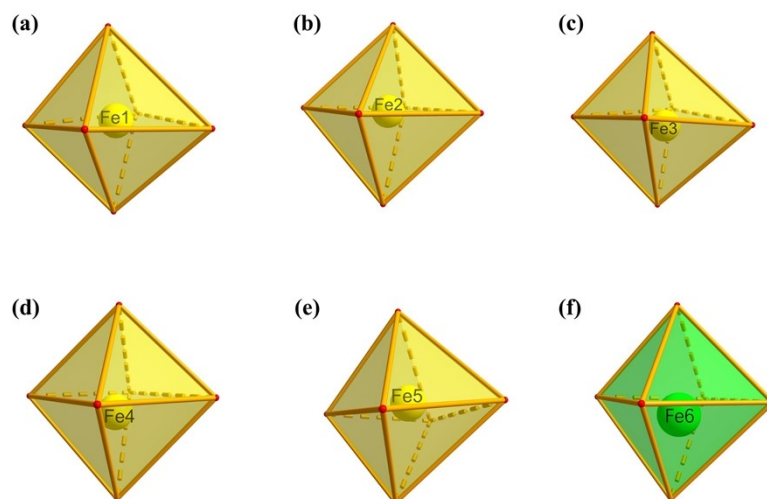

**Fig. S3.** Geometrical configuration of the  $\text{Fe}^{3+}$  cations in **1a**.

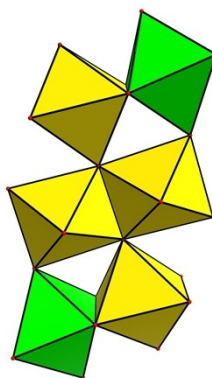

**Fig. S4.** The polyhedral representation of  $\{\text{Fe}_{4.7}\text{Ta}_{1.3}\text{O}_4\}$  core.

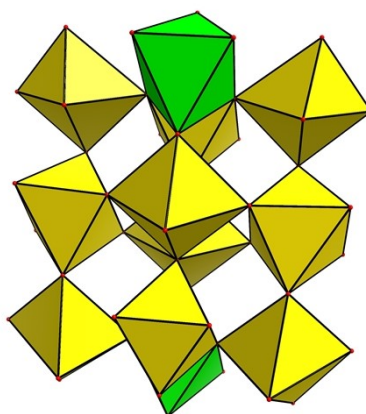

**Fig. S5.** The polyhedral representation of  $\{\text{Fe}_{10.7}\text{Ta}_{1.3}\text{O}_8(\text{OH})_8(\text{H}_2\text{O})_2\}$  core.

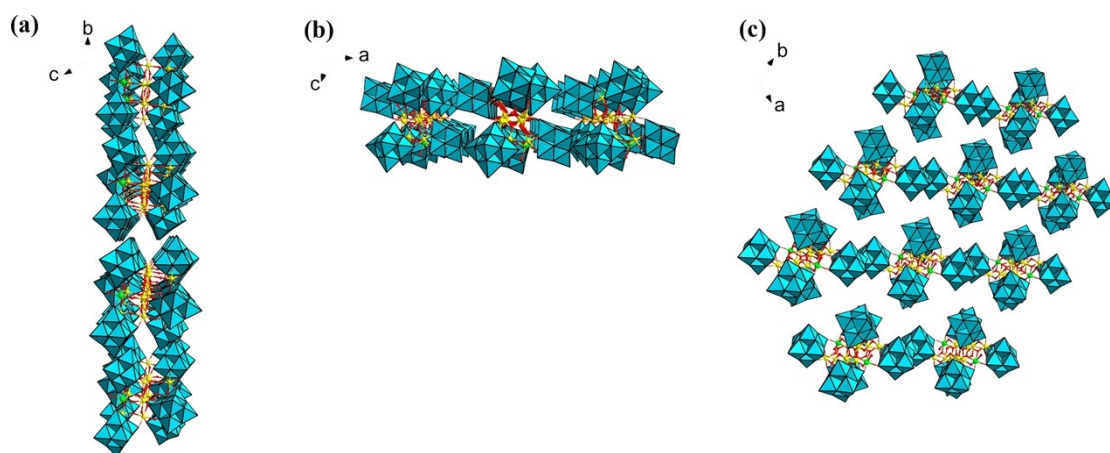

**Fig. S6.** The packing arrangements of polyoxoanion **1a** along the *a*, *b*, and *c*-axis, respectively.

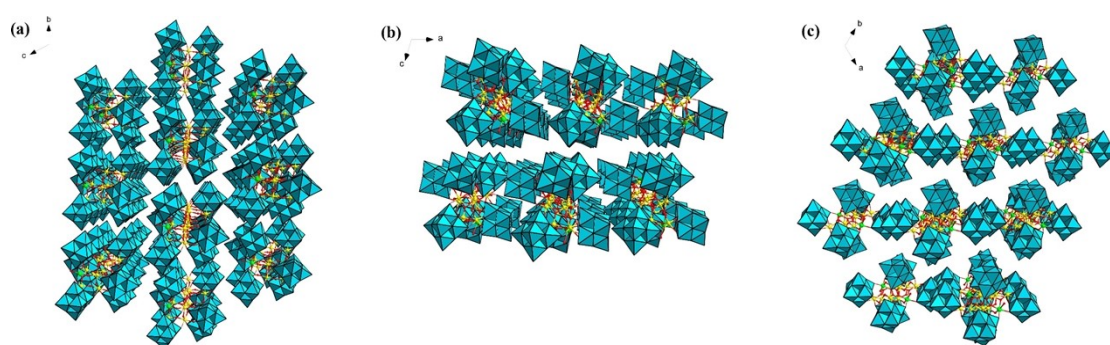

**Fig. S7.** Polyhedral views of the 3D stacking for **1a** along the *c*(a), *b*(b), and *a*(c) axis.

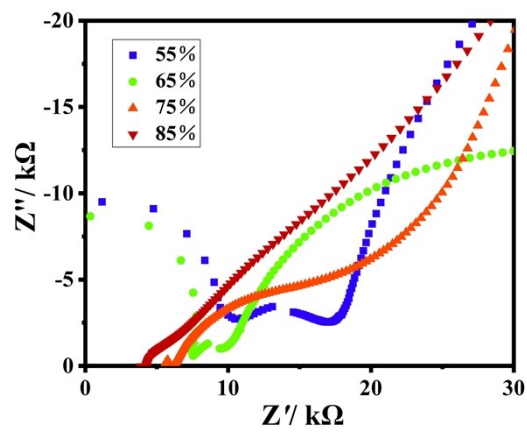

**Fig. S8.** Nyquist plots of **1** under different RHs at 25 °C.

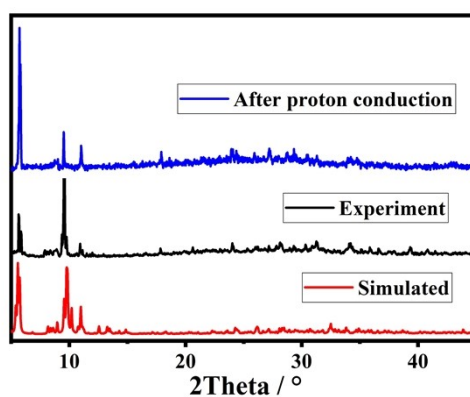

**Fig. S9.** The post proton conduction, experimental, and simulated PXRD patterns of **1**.

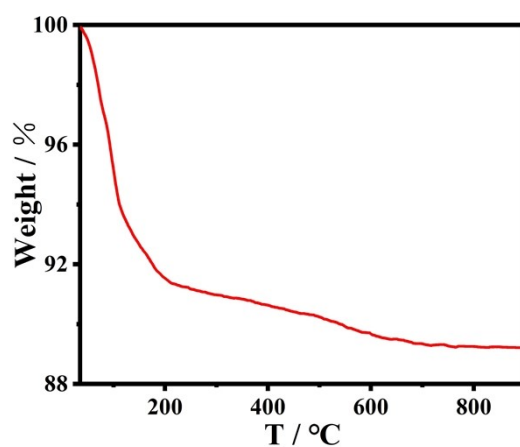

**Fig. S10.** TG curve of **1**.

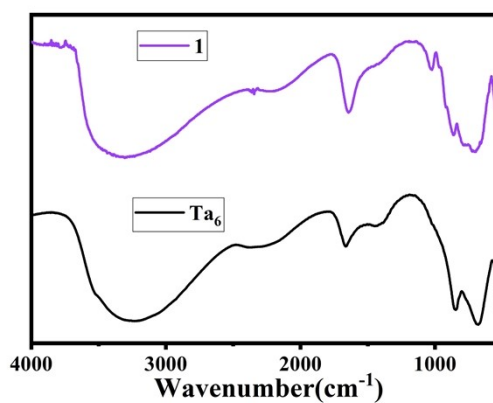

**Fig. S11.** IR spectra of **1** and  $K_8[Ta_6O_{19}] \cdot 17H_2O$  (**Ta<sub>6</sub>**).

## References

- S1 M. Han, Y. Niu, R. Wan, Q. Xu, J. Lu, P. Ma, C. Zhang, J. Niu and J. Wang, *Chem. - Eur. J.*, 2018, **24**, 11059–11066.
- S2 J. Niu, F. Li, J. Zhao, P. Ma, D. Zhang, B. Bassil, U. Kortz and J. Wang, *Chem. - Eur. J.*, 2014, **20**, 9852–9857.

- S3 G. M. Sheldrick, *Acta Crystallogr. Sect. C Struct. Chem.*, 2015, **71**, 3–8.
- S4 J. Goura, B. S. Bassil, J. K. Bindra, I. A. Rutkowska, P. J. Kulesza, N. S. Dalal and U. Kortz, *Chem. – Eur. J.*, 2020, **26**, 15821–15824.
- S5 B. Godin, Y.-G. Chen, J. Vaissermann, L. Ruhlmann, M. Verdaguer and P. Gouzerh, *Angew. Chem. Int. Ed.*, 2005, **44**, 3072–3075.
- S6 B. Liu, L. Li, Y. Zhang, Y. Ma, H. Hu and G. Xue, *Inorg. Chem.*, 2011, **50**, 9172–9177.
- S7 S. S. Mal, M. H. Dickman, U. Kortz, A. M. Todea, A. Merca, H. Bögge, T. Glaser, A. Müller, S. Nellutla, N. Kaur, J. van Tol, N. S. Dalal, B. Keita and L. Nadjo, *Chem. - Eur. J.*, 2008, **14**, 1186–1195.
- S8 T. Cui, L. Qin, F. Fu, X. Xin, H. Li, X. Fang and H. Lv, *Inorg. Chem.*, 2021, **60**, 4124–4132.
- S9 M. Ibrahim, A. Haider, Y. Xiang, B. S. Bassil, A. M. Carey, L. Rullik, G. B. Jameson, F. Doungmene, I. M. Mbomekallé, P. de Oliveira, V. Mereacre, G. E. Kostakis, A. K. Powell and U. Kortz, *Inorg. Chem.*, 2015, **54**, 6136–6146.
- S10 V. Singh, Z. Chen, P. Ma, D. Zhang, M. G. B. Drew, J. Niu and J. Wang, *Chem. - Eur. J.*, 2016, **22**, 10983–10989.
- S11 W. Chen, Y. Li, Y. Wang, E. Wang and Z. Zhang, *Z. Für Anorg. Allg. Chem.*, 2009, **635**, 1678–1687.
- S12 C. Pichon, A. Dolbecq, P. Mialane, J. Marrot, E. Rivière and F. Sécheresse, *Dalton Trans.*, 2008, 71–76.
- S13 C. P. Pradeep, D.-L. Long, P. Kögerler and L. Cronin, *Chem. Commun.*, 2007, 4254–4256.
- S14 X. Du, J. Zhao, J. Mi, Y. Ding, P. Zhou, B. Ma, J. Zhao and J. Song, *Nano Energy*, 2015, **16**, 247–255.
- S15 W.-C. Chen, C. Qin, X.-L. Wang, Y.-G. Li, H.-Y. Zang, P. Huang, K.-Z. Shao, Z.-M. Su and E.-B. Wang, *Chem Commun*, 2014, **50**, 13265–13267.
- S16 S. Lin, W. Liu, Y. Li, Q. Wu, E. Wang and Z. Zhang, *Dalton Trans.*, 2010, **39**, 1740–1744.
- S17 M. Baranov, L. Polin, N. Leffler, G. Leitus, A. I. Shames and I. A. Weinstock, *Dalton Trans.*, 2022, **51**, 8600–8604.
- S18 B. Godin, J. Vaissermann, P. Herson, L. Ruhlmann, M. Verdaguer and P. Gouzerh, *Chem. Commun.*, 2005, 5624–5626.
- S19 P. Wu, Y. Zhang, C. Feng, B. Liu, H. Hu and G. Xue, *Dalton Trans.*, 2018, **47**, 15661–15665.
- S20 A. Miiller, W. Plass, E. Krickemeyer, S. Dillinger, C. Beugholt and U. Bergmann, *Monatshefte Ffir Chem.*, 1994, **125**, 525–533.
- S21 L.-H. Bi, U. Kortz, S. Nellutla, A. C. Stowe, J. van Tol, N. S. Dalal, B. Keita and L. Nadjo, *Inorg. Chem.*, 2005, **44**, 896–903.
- S22 B. Botar, Y. V. Geletii, P. Kögerler, D. G. Musaev, K. Morokuma, I. A. Weinstock and C. L. Hill, *J. Am. Chem. Soc.*, 2006, **128**, 11268–11277.
- S23 B. Li, J.-W. Zhao, S.-T. Zheng and G.-Y. Yang, *Inorg. Chem. Commun.*, 2009, **12**, 69–71.
- S24 X. Dong, Y. Zhang, B. Liu, Y. Zhen, H. Hu and G. Xue, *Inorg. Chem.*, 2012, **51**, 2318–2324.
- S25 D. Zhang, C. Wang, S. Li, J. Liu, P. Ma, J. Wang and J. Niu, *J. Solid State Chem.*, 2013, **198**, 18–23.
- S26 A. Teze and J. Vaissermann, *C R Acad Sci Paris Se'rie IIc Chim. Chem.*, 2000, **3**, 101–105.
- S27 U. Kortz, M. G. Savelieff, B. S. Bassil, B. Keita and L. Nadjo, *Inorg. Chem.*, 2002, **41**, 783–789.
- S28 Y. Liu, J. Shang, G. Xue, H. Hu, F. Fu and J. Wang, *J. Clust. Sci.*, 2007, **18**, 205–216.

- S29 L. Chen, K. Zhu, L.-H. Bi, A. Suchopar, M. Reicke, G. Mathys, H. Jaensch, U. Kortz and R. M. Richards, *Inorg. Chem.*, 2007, **46**, 8457–8459.
- S30 A. Dolbecq, J.-D. Compain, P. Mialane, J. Marrot, E. Rivière and F. Sécheresse, *Inorg. Chem.*, 2008, **47**, 3371–3378.
- S31 X. Ma, K. Yu, J. Yuan, L. Cui, J. Lv, W. Dai and B. Zhou, *Inorg. Chem.*, 2020, **59**, 5149–5160.
- S32 D. Rusu, C. Crăciun, A.-L. Barra, L. David, M. Rusu, C. Roșu, O. Cozar and G. Marcu, *J. Chem. Soc. Dalton Trans.*, 2001, 2879–2887.
- S33 T. M. Anderson, X. Zhang, K. I. Hardcastle and C. L. Hill, *Inorg. Chem.*, 2002, **41**, 2477–2488.
- S34 I. M. Mbomekalle, B. Keita, L. Nadjo, P. Berthet, K. I. Hardcastle, C. L. Hill and T. M. Anderson, *Inorg. Chem.*, 2003, **42**, 1163–1169.
- S35 I. M. Mbomekalle, B. Keita, L. Nadjo, W. A. Neiwert, L. Zhang, K. I. Hardcastle, C. L. Hill and T. M. Anderson, *Eur. J. Inorg. Chem.*, 2003, **2003**, 3924–3928.
- S36 N. M. Okun, M. D. Ritorto, T. M. Anderson, R. P. Apkarian and C. L. Hill, *Chem. Mater.*, 2004, **16**, 2551–2558.
- S37 T. M. Anderson, W. A. Neiwert, K. I. Hardcastle and C. L. Hill, *Inorg. Chem.*, 2004, **43**, 7353–7358.
- S38 T. M. Anderson, R. Cao, W. A. Neiwert, K. I. Hardcastle, C. L. Hill, M. Ammam, B. Keita and L. Nadjo, *Eur. J. Inorg. Chem.*, 2005, **2005**, 1770–1775.
- S39 X. Zhang, T. M. Anderson, Q. Chen and C. L. Hill, *Inorg. Chem.*, 2001, **40**, 418–419.
- S40 N. H. Nsouli, S. S. Mal, M. H. Dickman, U. Kortz, B. Keita, L. Nadjo and J. M. Clemente-Juan, *Inorg. Chem.*, 2007, **46**, 8763–8770.
- S41 B. Botar and P. Kögerler, *Dalton Trans.*, 2008, 3150–3152.
- S42 H. Xu, L. Li, B. Liu, G. Xue, H. Hu, F. Fu and J. Wang, *Inorg. Chem.*, 2009, **48**, 10275–10280.
- S43 H. H. Wu, Z. M. Zhang and E. B. Wang, *Chin. Chem. Lett.*, 2012, **23**, 355–358.
- S44 P. Huang, X.-G. Han, X.-L. Li, C. Qin, X.-L. Wang and Z.-M. Su, *CrystEngComm*, 2016, **18**, 8722–8725.
- S45 Q. Wu, X. Miao, H. Wang, Y. Wu, J. Li, J. Lu, Q. Zhou and H. Ju, *Z. Für Naturforschung B*, 2016, **71**, 783–788.
- S46 C. S. Ayingone Mezui, P. de Oliveira, A.-L. Teillout, J. Marrot, P. Berthet, M. Lebrini and I. M. Mbomekallé, *Inorg. Chem.*, 2017, **56**, 1999–2012.
- S47 X. Xin, N. Hu, Y. Ma, Y. Wang, L. Hou, H. Zhang and Z. Han, *Dalton Trans.*, 2020, **49**, 4570–4577.
- S48 Y. Xue, J. Chen, J. Shao, L. Han, W. Li and C. Sui, *Mol. Catal.*, 2020, **492**, 111010.
- S49 A. V. Besserguenev, M. H. Dickman and M. T. Pope, *Inorg. Chem.*, 2001, **40**, 2582–2586.
- S50 G.-L. Guo, Y.-Q. Xu, B.-K. Chen, Z.-G. Lin and C.-W. Hu, *Inorg. Chem. Commun.*, 2011, **14**, 1448–1451.
- S51 P. A. Abramov, M. N. Sokolov, S. Floquet, M. Haouas, F. Taulelle, E. Cadot, E. V. Peresyphkina, A. V. Virovets, C. Vicent, N. B. Kompankov, A. A. Zhdanov, O. V. Shuvaeva and V. P. Fedin, *Inorg. Chem.*, 2014, **53**, 12791–12798.
- S52 P. A. Abramov, M. N. Sokolov, A. V. Virovets, S. Floquet, M. Haouas, F. Taulelle, E. Cadot, C. Vicent and V. P. Fedin, *Dalton Trans.*, 2015, **44**, 2234–2239.
- S53 J. Son and W. H. Casey, *Chem. – Eur. J.*, 2016, **22**, 14155–14157.

- S54 P. A. Abramov, C. Vicent, N. B. Kompankov, A. L. Gushchin and M. N. Sokolov, *Eur. J. Inorg. Chem.*, 2016, **2016**, 154–160.
- S55 P. A. Abramov, N. B. Kompankov and M. N. Sokolov, *Russ. J. Coord. Chem.*, 2016, **42**, 311–315.
- S56 Z. Liang, S. Zhao, P. Ma, C. Zhang, J. Sun, T. Song, J. Niu and J. Wang, *Inorg. Chem.*, 2018, **57**, 12471–12474.
- S57 S. Li, S. Chen, F. Zhang, Z. Li, C. Zhang, G. Cao and B. Zhai, *Inorg. Chem. Commun.*, 2019, **106**, 228–232.
- S58 Y. Ma, J. Sun, C. Li, N. Li, P. Ma, D. Zhang, G. Wang and J. Niu, *Inorg. Chem. Commun.*, 2019, **101**, 6–10.
- S59 Z. Li, J. Zhang, L.-D. Lin, J.-H. Liu, X.-X. Li and S.-T. Zheng, *Chem. Commun.*, 2019, **55**, 11735–11738.
- S60 D.-C. Krause, S. Mangelsen, C. Näther and W. Bensch, *Cryst. Growth Des.*, 2021, **21**, 7128–7138.
